# Supplementary material
Source: MDPI journal article supplement (https://www.mdpi.com/2624-8549/3/3/78)
Supplement: s1 [file s1]

---

## Supplementary Materials

### Absorption and Isomerization of Azobenzene guest molecules in Polymeric Nanoporous Crystalline Phases

Nicola Coscia <sup>1</sup>, Antonietta Cozzolino <sup>1</sup>, Manohar Golla <sup>1</sup> and Paola Rizzo <sup>1,\*</sup>

<sup>1</sup>Department of Chemistry and Biology, INSTM Research Unit, Università degli Studi di Salerno, via Giovanni Paolo II, 84084 Fisciano (SA), Italy

\*Paola Rizzo, Department of Chemistry and Biology, Università degli Studi di Salerno, Via Giovanni Paolo II, 84084, Fisciano, Italy. Tel. +39 (0) 89 969582 Fax.: +39 (0) 89 969603.

[prizzo@unisa.it](mailto:prizzo@unisa.it)

---

UV-vis spectra of 0.2 wt% azobenzene/methanol solution before (black line) and after photoisomerization (green line) and as collected at different times during spontaneous cis-trans isomerization (colored curves) are reported in Figure S1. Half-time of cis-trans azobenzene isomerization in 0.2 wt% azobenzene/methanol was ~240 h (10 days).

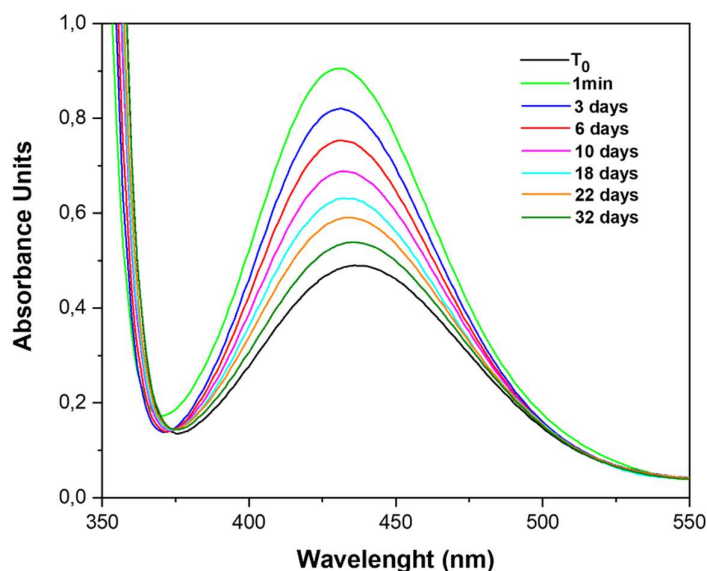

**Figure S1.** UV-Visible spectra in the range 350-550 nm of 0.2 wt% azobenzene/methanol solution before (black line), after photoisomerization (green line) and as collected at different times during spontaneous cis-trans isomerization (colored curves).

UV-Visible spectra of 50  $\mu\text{m}$  thick films:  $\alpha$  CC PPO (red line),  $\beta$  CC PPO (blue line), amorphous PPO (black line) and  $\delta$  CC s-PS (green line) after immersion for 30 minutes in 2 wt% azobenzene/methanol solution are reported in Figure S2.

The content of azobenzene, evaluated by thermogravimetric measurements (TGA), was 7,3 wt%, 9 wt% and 2,8 wt% for  $\alpha$ ,  $\beta$  CC and amorphous PPO films, respectively and 1 wt% for  $\delta$  CC s-PS films.

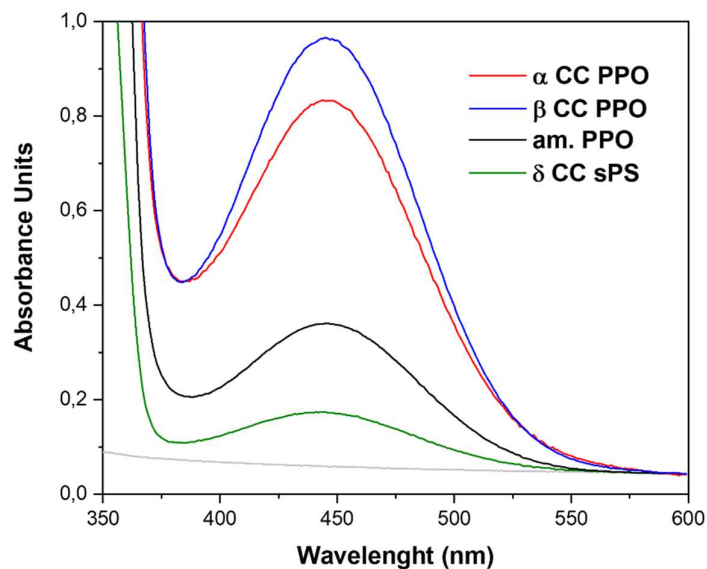

**Figure S2.** UV-Visible spectra in the range 350-600 nm of  $\alpha$  CC PPO (red line),  $\beta$  CC PPO (blue line), amorphous PPO (black line) and  $\delta$  CC s-PS (green line) films after immersion for 30 minutes in 2 wt% azobenzene/methanol solution. PPO film spectra (gray line) is also reported for comparison.
