# Supplementary material
Source: MDPI journal article supplement (https://www.mdpi.com/2624-8549/3/3/78)
Supplement: s1 [file s1]

Archive with 1 entries (1 files):
- chemistry-1327340-supplementary.pdf
